# Supplementary material for: Mercury Levels in Human Hair and Farmed Fish near Artisanal and Small-Scale Gold Mining Communities in the Madre de Dios River Basin, Peru
Source: Preprints.org preprint supplement (doi:10.20944/preprints201703.0076.v1), 2017-03-14
Supplement: Supplementary file 1 [file supplementary]

## SUPPLEMENTAL INFORMATION

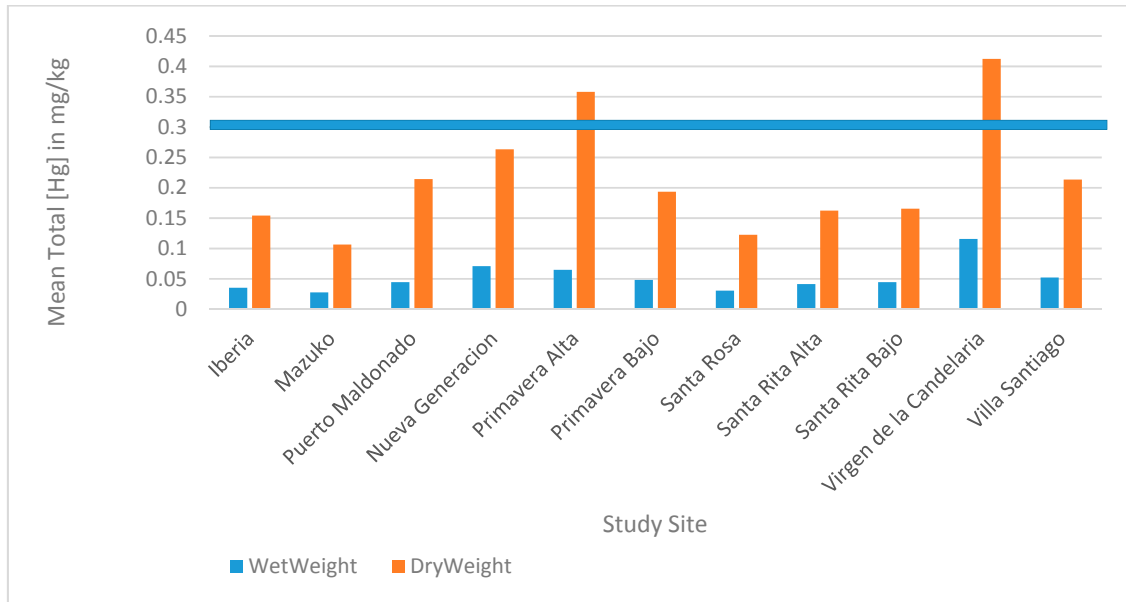

**Figure S1:** Comparison of mercury in paco fish tissue by study site: mean wet weight mercury concentration (mg/kg), mean dry weight mercury concentration (mg/kg)
